# Supplementary material
Source: PubMed Central journal article supplement (PMC3865341)

**Worldwide trends in incidence rates for oral cavity and oropharyngeal cancers**

**Chaturvedi, et al.**

## **Data Supplement**

**Supplemental Table 1:** Shows age ranges used for age-period cohort analyses of oropharyngeal cancers and oral cavity cancers, separately among men and women.

**Supplemental Table 2:** Shows net drifts from age-period cohort modeling for oropharyngeal cancers, oral cavity cancers, and lung cancers among men in countries with non-significant trends or with significantly decreasing trends in oropharyngeal cancer incidence. P-values comparing oropharyngeal cancers vs. oral cavity cancers as well as comparing oropharyngeal cancers vs. lung cancers are also shown.

**Supplemental Table 3:** Shows net drifts from age-period cohort modeling for oropharyngeal cancers, oral cavity cancers, and lung cancers among women in countries with non-significant trends or with significantly decreasing trends in oropharyngeal cancer incidence. P-values comparing oropharyngeal cancers vs. oral cavity cancers as well as comparing oropharyngeal cancers vs. lung cancers are also shown.

**Supplementary Figure 1:** Shows trends in the proportion of oral cavity and oropharyngeal cancers (combined) that did not have an anatomic site specification. Results are shown for countries with significant increases in oropharyngeal cancer incidence either among men or among women.

**Supplemental Table 1: Age ranges utilized for age-period cohort analyses (1983-2002)**

| <b>Country</b>                   | <b>Age range (men)</b> | <b>Age range (women)</b> |
|----------------------------------|------------------------|--------------------------|
| <b>Asia</b>                      | 25-74                  |                          |
| India                            | 25-84                  | 25-74                    |
| Japan                            | 25-74                  | 30-74                    |
| Philippines                      | 30-79                  | 25-74                    |
| Singapore                        | 30-74                  | 35-60                    |
| Thailand                         |                        | 30-74                    |
| <b>Australia</b>                 | 30-84                  | 30-79                    |
| <b>Europe</b>                    |                        |                          |
| Austria                          | 40-79                  | 40-69                    |
| Denmark                          | 35-84                  | 35-84                    |
| Estonia                          | 30-84                  | 40-79                    |
| France                           | 35-84                  | 35-84                    |
| Italy                            | 35-84                  | 35-84                    |
| Netherlands                      | 40-74                  | 40-74                    |
| Poland                           | 35-74                  | 35-69                    |
| Slovakia                         | 35-84                  | 35-79                    |
| Spain                            | 40-69                  | 40-69                    |
| Switzerland                      | 40-84                  | 40-84                    |
| U.K.                             | 25-84                  | 25-84                    |
| <b>North America</b>             |                        |                          |
| Canada                           | 30-84                  | 30-84                    |
| U.S.                             | 25-84                  | 25-84                    |
| <b>South and Central America</b> |                        |                          |
| Brazil                           | 40-79                  | 50-69                    |
| Colombia/Costa Rica/ Ecuador     | 30-84                  | 35-79                    |

**Supplemental Table 2: Net drifts for oropharyngeal cancers, oral cavity cancers, and lung cancers among men for countries with non-significant trends or significantly decreasing trends in incidence of oropharyngeal cancers (1983-2002)**

| Country                                                                            | Oropharyngeal cancers <sup>a</sup><br>Net Drift (95% CI) <sup>c</sup> | Oral cavity cancers <sup>b</sup><br>Net Drift (95% CI) <sup>c</sup> | Lung cancer Net Drift (95% CI) <sup>c</sup> | P-value for oropharyngeal vs. oral cavity | P- value for oropharyngeal vs. lung cancer |
|------------------------------------------------------------------------------------|-----------------------------------------------------------------------|---------------------------------------------------------------------|---------------------------------------------|-------------------------------------------|--------------------------------------------|
| <b>Asia</b>                                                                        |                                                                       |                                                                     |                                             |                                           |                                            |
| India                                                                              | -3.6 (-2.9 to -4.3)                                                   | 1.0 (0.4 to -1.7)                                                   | -1.3 (-0.0 to -2.6)                         | <0.001                                    | 0.002                                      |
| Philippines                                                                        | -1.8 (-4.0 to 0.4)                                                    | -2.8 (-1.3 to -4.4)                                                 | -4.3 (-2.8 to -5.8)                         | 0.46                                      | 0.07                                       |
| Singapore                                                                          | 0.02 (-2.5 to 2.6)                                                    | -0.1 (-2.6 to 2.4)                                                  | -5.1 (-3.3 to -6.9)                         | 0.93                                      | <0.001                                     |
| Thailand                                                                           | 2.9 (-1.0 to 6.9)                                                     | 1.0 (-2.9 to 5.0)                                                   | -1.3 (-4.7 to 2.2)                          | 0.51                                      | 0.12                                       |
| <b>Europe</b>                                                                      |                                                                       |                                                                     |                                             |                                           |                                            |
| Austria                                                                            | 2.8 (-2.4 to 8.2)                                                     | -0.1 (-4.1 to 4.0)                                                  | -5.2 (-3.1 to -7.2)                         | 0.40                                      | 0.005                                      |
| Estonia                                                                            | 2.1 (-0.03 to 4.2)                                                    | 1.7 (0.0 to 3.5)                                                    | 6.7 (5.5 to 7.9)                            | 0.80                                      | <0.001                                     |
| France                                                                             | -2.8 (-2.3 to -3.3)                                                   | -2.8 (-2.2 to -3.3)                                                 | -3.0 (-2.4 to -3.6)                         | 0.82                                      | 0.64                                       |
| Italy                                                                              | -1.2 (-0.2 to -2.2)                                                   | -1.4 (-0.5 to -2.2)                                                 | -4.5 (-3.9 to -5.1)                         | 0.84                                      | <0.001                                     |
| Poland                                                                             | 2.7 (0.01 to 5.4)                                                     | 0.3 (-1.7 to 2.3)                                                   | -3.7 (-2.4 to -5.0)                         | 0.16                                      | <0.001                                     |
| Spain                                                                              | 1.3 (-0.1 to -5.4)                                                    | 0.3 (-1.7 to 2.3)                                                   | 0.4 (-0.6 to 1.4)                           | 0.36                                      | 0.31                                       |
| Switzerland                                                                        | 1.0 (-0.5 to 2.6)                                                     | -0.8 (-2.3 to 0.8)                                                  | -4.5 (-3.5 to -5.5)                         | 0.11                                      | <0.001                                     |
| <b>South and Central America</b><br>Colombia, Costa Rica, and Ecuador <sup>d</sup> | 0.5 (-1.7 to 2.9)                                                     | -2.4 (-0.6 to -4.1)                                                 | -4.6 (-2.9 to -6.3)                         | 0.05                                      | <0.001                                     |

<sup>a</sup> Oropharyngeal cancers: base of tongue, lingual tonsil, tonsil, oropharynx, pharynx not otherwise specified, and Waldeyer ring.

<sup>b</sup> Oral cavity cancers: oral tongue, gum, floor of mouth, palate, and other and unspecified parts of the mouth.

<sup>c</sup> Net drifts and 95% CIs estimated from age-period-cohort modeling.

<sup>d</sup> Registries in Colombia, Costa Rica, and Ecuador were combined for analyses due to sparse sample sizes.

**Supplemental Table 3: Net drifts for oropharyngeal cancers, oral cavity cancers, and lung cancers among women for countries with stable or decreasing incidence of oropharyngeal cancers (1983-2002)**

| Country                                        | Oropharyngeal cancers <sup>a</sup><br>Net Drift (95% CI)<br><sup>c</sup> | Oral cavity cancers <sup>b</sup><br>Net Drift (95% CI) <sup>c</sup> | Lung cancers<br>Net Drift (95% CI) <sup>c</sup> | P-value for oropharyngeal vs. oral cavity | P-value for oropharyngeal vs. lung cancer |
|------------------------------------------------|--------------------------------------------------------------------------|---------------------------------------------------------------------|-------------------------------------------------|-------------------------------------------|-------------------------------------------|
| <b>Asia</b>                                    |                                                                          |                                                                     |                                                 |                                           |                                           |
| India                                          | -4.1 (-2.9 to -5.4)                                                      | -2.1 (-1.4 to -2.8)                                                 | NE                                              | 0.006                                     | NE                                        |
| Japan                                          | 2.8 (-0.1 to -5.7)                                                       | -0.01 (-1.1 to 1.1)                                                 | 1.2 (-0.9 to 3.3)                               | 0.08                                      | 0.39                                      |
| Philippines                                    | -7.5 (-4.8 to -10.2)                                                     | -4.9 (-3.1 to -6.7)                                                 | -3.8 (-1.5 to -6.1)                             | 0.12                                      | 0.23                                      |
| Singapore                                      | 3.4 (-3.4 to 10.7)                                                       | 1.6 (-1.9 to 5.3)                                                   | -6.3 (-2.1 to -10.3)                            | 0.66                                      | 0.02                                      |
| Thailand                                       | -5.6 (-9.8 to -1.2)                                                      | -1.1 (-4.4 to 2.3)                                                  | -2.7 (-0.6 to -4.6)                             | 0.11                                      | 0.19                                      |
| <b>Australia</b>                               | 1.2 (-0.2 to 2.7)                                                        | 0.5 (-0.3 to 1.3)                                                   | -2.3 (-1.1 to -3.5)                             | 0.37                                      | <0.001                                    |
| <b>Europe</b>                                  |                                                                          |                                                                     |                                                 |                                           |                                           |
| Austria                                        | 1.4 (-8.1 to 11.8)                                                       | -0.6 (-9.3 to 8.9)                                                  | 1.4 (-4.1 to 7.3)                               | 0.78                                      | 0.99                                      |
| Italy                                          | -0.1 (-2.8 to 2.6)                                                       | 2.2 (0.7 to 3.7)                                                    | 0.8 (-0.4 to -1.9)                              | 0.15                                      | 0.28                                      |
| Spain                                          | 0.7 (-3.9 to 5.5)                                                        | 5.5 (1.4 to 9.6)                                                    | 4.3 (0.9 to 7.8)                                | 0.13                                      | 0.22                                      |
| <b>North America</b>                           |                                                                          |                                                                     |                                                 |                                           |                                           |
| Canada                                         | -0.2 (-1.1 to 0.6)                                                       | -0.6 (-1.2 to 0.0)                                                  | -1.8 (-1.2 to -2.4)                             | 0.50                                      | 0.003                                     |
| U.S.                                           | -1.6 (-0.9 to -2.3)                                                      | -1.5 (-0.9 to -2.1)                                                 | -2.4 (-1.4 to -3.3)                             | 0.84                                      | 0.13                                      |
| <b>South and Central America</b>               |                                                                          |                                                                     |                                                 |                                           |                                           |
| Brazil                                         | 1.1 (-9.6 to 12.9)                                                       | 3.8 (-3.2 to 11.3)                                                  | 4.1 (-10.4 to 2.6)                              | 0.69                                      | 0.70                                      |
| Colombia, Costa Rica, and Ecuador <sup>d</sup> | -3.6 (-7.8 to 0.9)                                                       | -1.4 (-3.2 to 0.5)                                                  | -1.5 (-4.4 to 1.5)                              | 0.37                                      | 0.50                                      |

<sup>a</sup> Oropharyngeal cancers: base of tongue, lingual tonsil, tonsil, oropharynx, pharynx not otherwise specified, and Waldeyer ring.

<sup>b</sup> Oral cavity cancers: oral tongue, gum, floor of mouth, palate, and other and unspecified parts of the mouth.

<sup>c</sup> Net drifts and 95% CIs estimated from age-period-cohort modeling

<sup>d</sup> Registries in Colombia, Costa Rica, and Ecuador were combined for analyses due to sparse sample sizes.

**Supplementary Figure 1:** Trends in the proportion of oral cavity and oropharyngeal cancers (combined) that did not have an anatomic site specification (1983-2002)

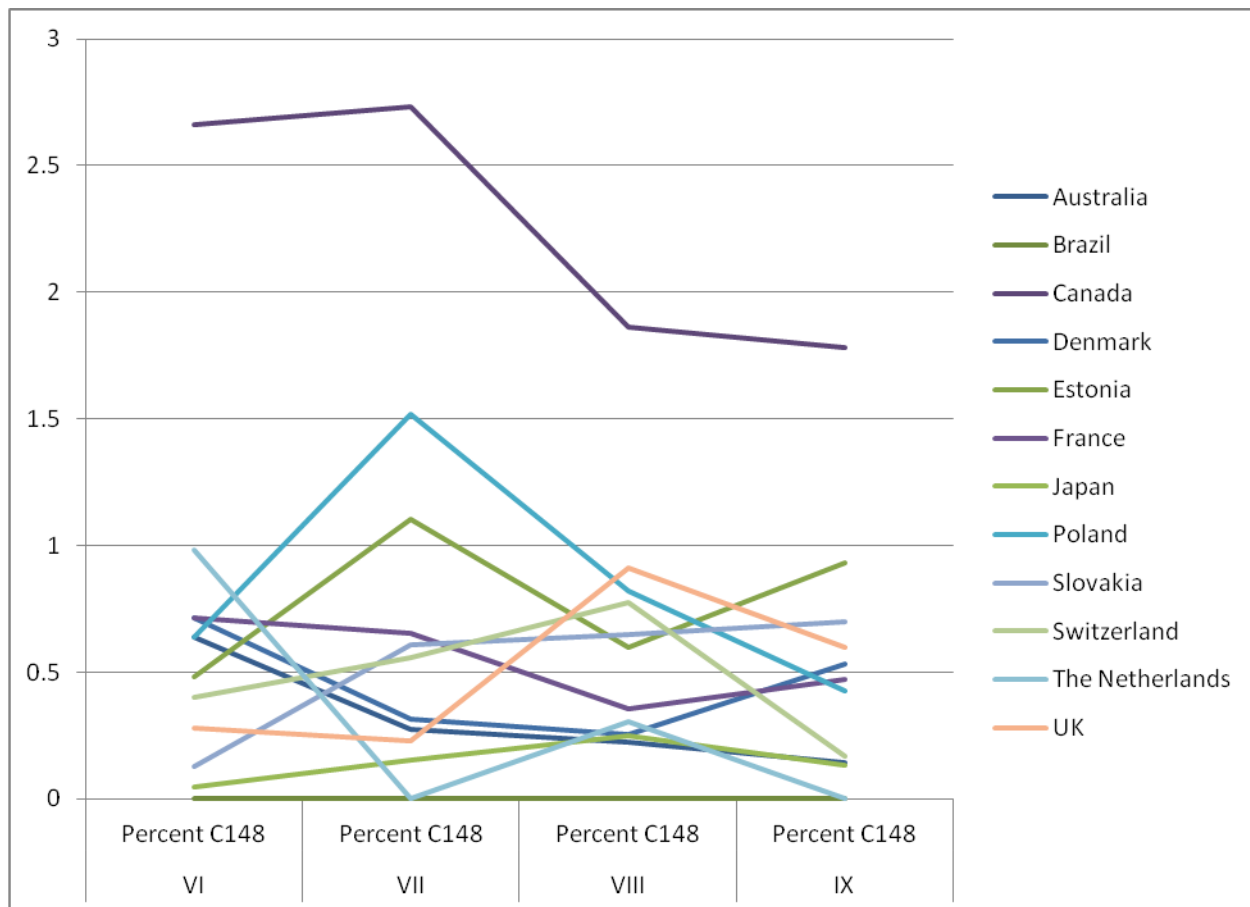

Supplement: supp_JCO.2013.50.3870_Data_Supplement_JCO.2013.50.3870.pdf [file supp_JCO.2013.50.3870_Data_Supplement_JCO.2013.50.3870.pdf]
