# Supplementary material
Source: PubMed Central journal article supplement (PMC3865341)

**Worldwide trends in incidence rates for oral cavity and oropharyngeal cancers**

**Chaturvedi, et al**

**Figure 3A: Incidence trends for oropharyngeal and oral cavity cancers among men stratified by age (1983-2002)**

**Figure 3B: Incidence trends for oropharyngeal and oral cavity cancers among women stratified by age (1983-2002)**

### United States

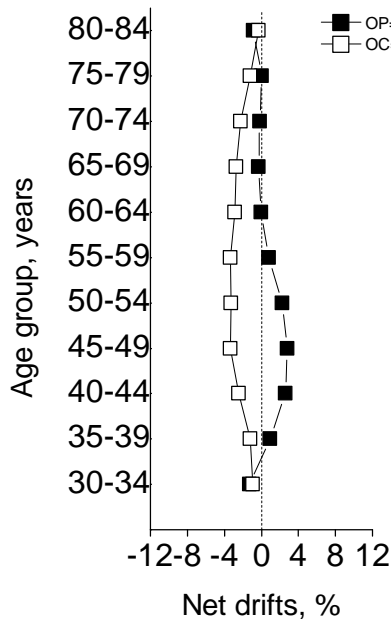

### Australia

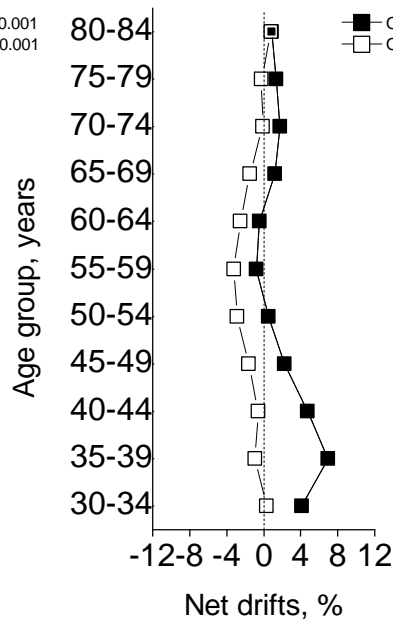

### Canada

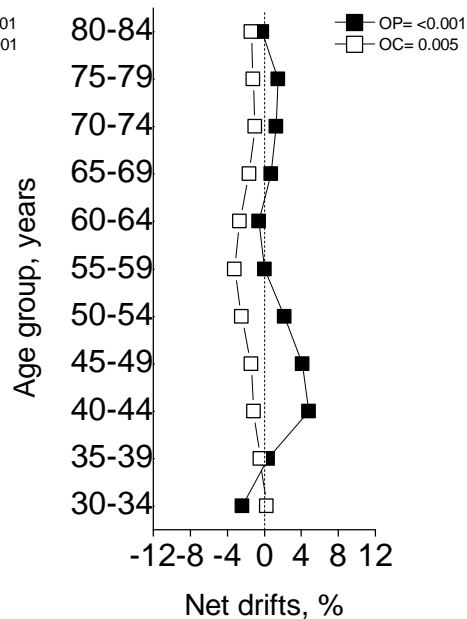

### Slovakia

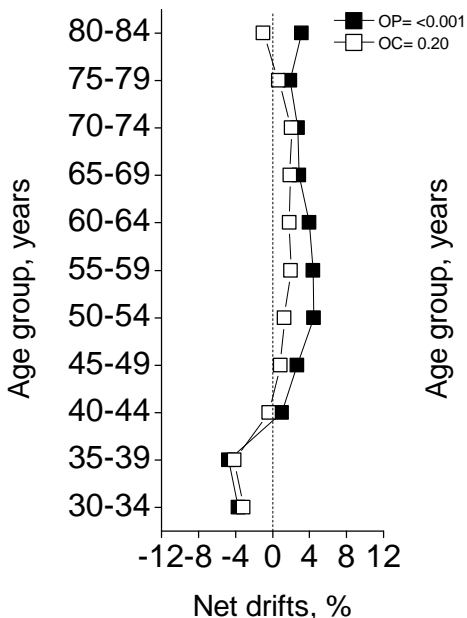

### Japan

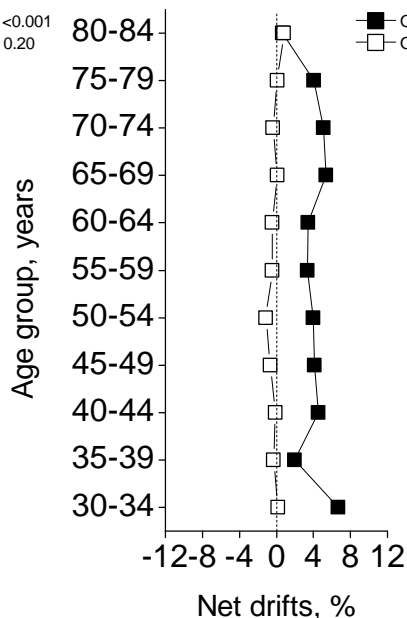

### Denmark

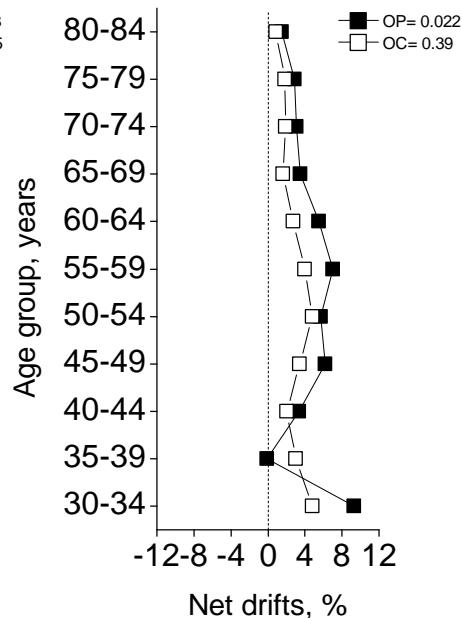

### UK

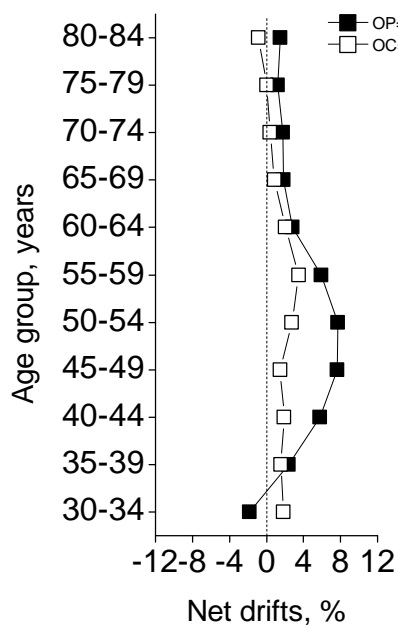

### Brazil

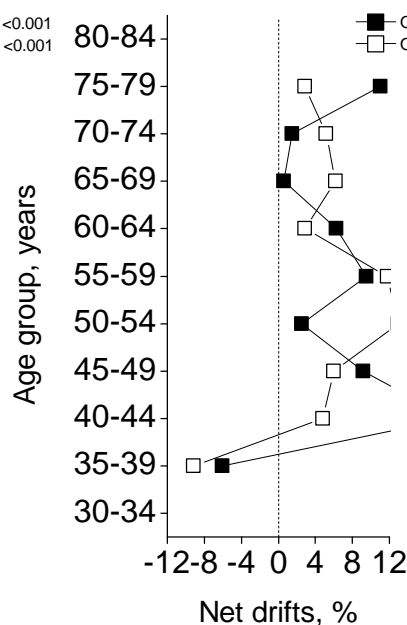

### Netherlands

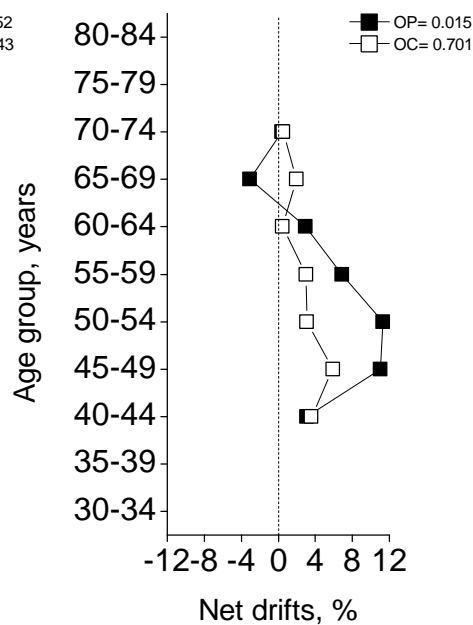

Denmark

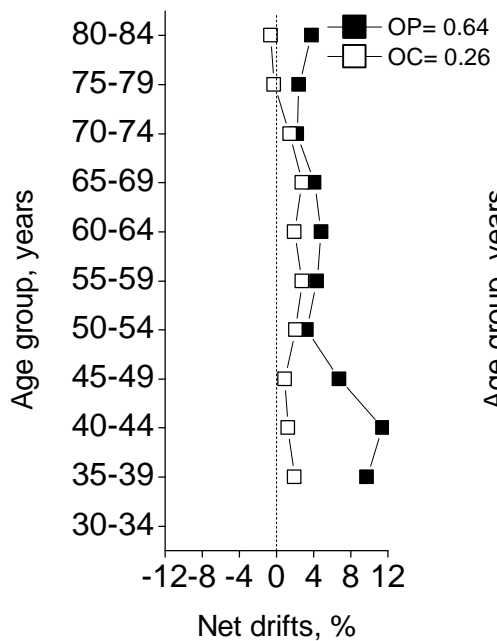

Estonia

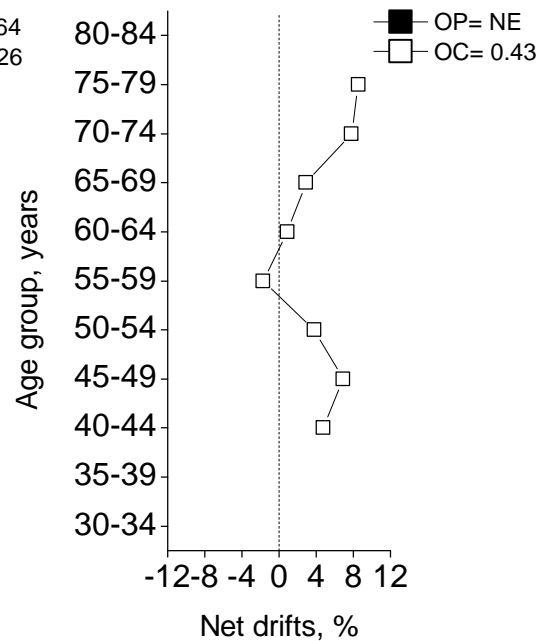

France

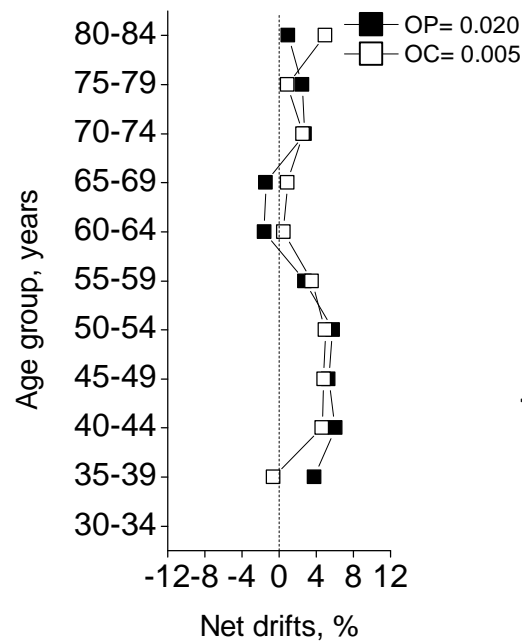

Netherlands

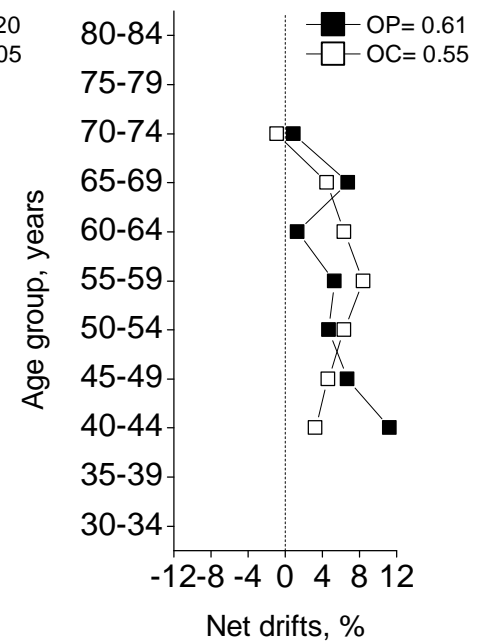

Slovakia

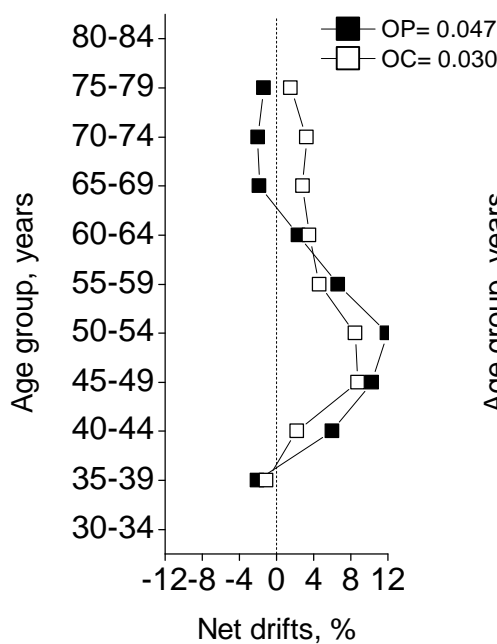

Poland

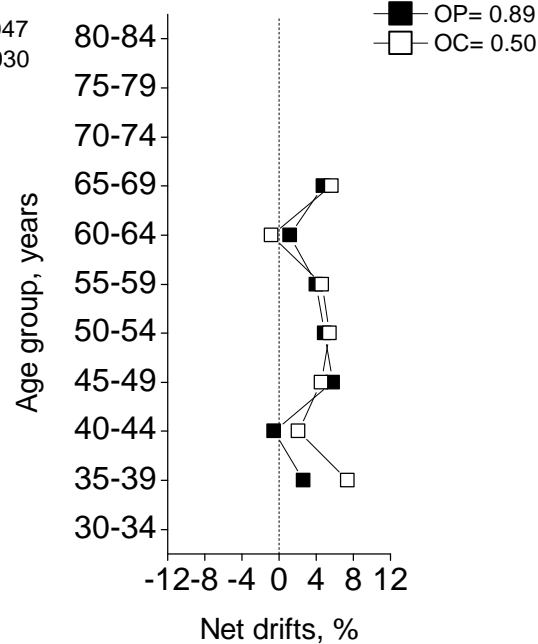

Switzerland

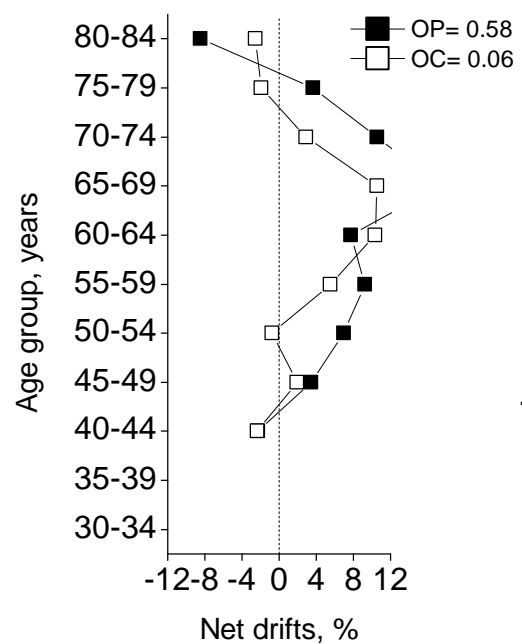

UK

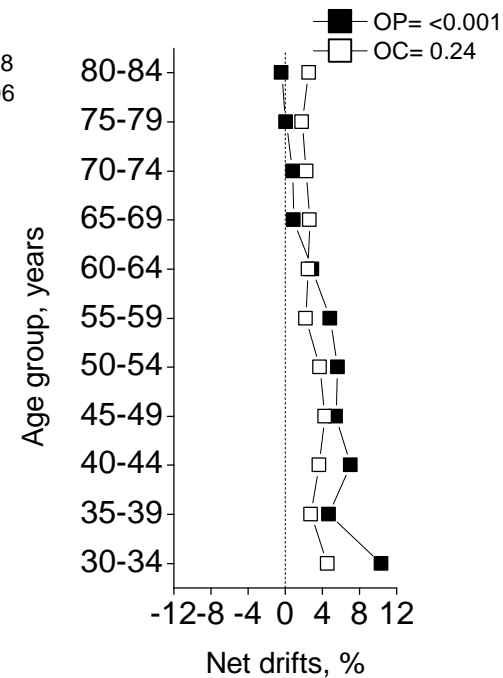

Supplement: supp_JCO.2013.50.3870_Figure3_JCO.2013.50.3870.pdf [file supp_JCO.2013.50.3870_Figure3_JCO.2013.50.3870.pdf]
